# Supplementary material
Source: Springer Nature journal article supplement (https://www.springermedizin.de/resource/supplementary/12943_2009_534_MOESM2_ESM.pdf/9554622)

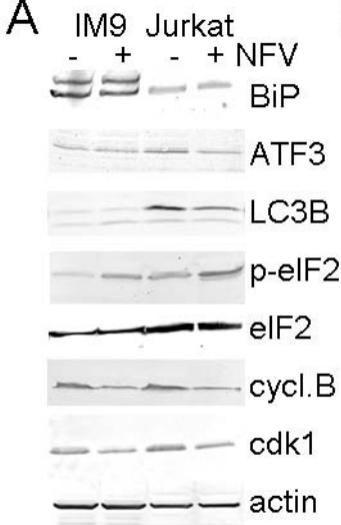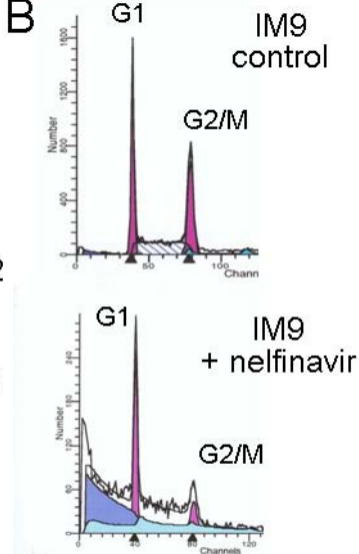

Supplement: MOESM2 [file 9554622]
